# Supplementary material for: Novel sample preparation technique based on functional nanofiber mat for sensitive and precise determination of phenolic environmental estrogens in environmental water
Source: Royal Society of Chemistry journal article supplement (doi:10.1039/c5ay00422e), 2015-01-01
Supplement: c5ay00422e1.pdf [file c5ay00422e1.pdf]

Figure S1

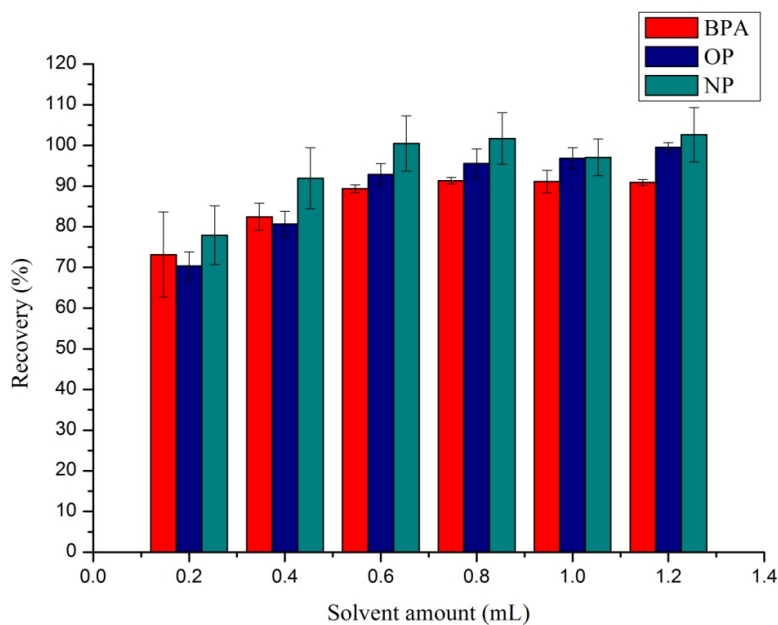

Fig

Figure S1 Effect of eluant solvent volume on the recoveries of three PEEs (n =6)

Figure S2

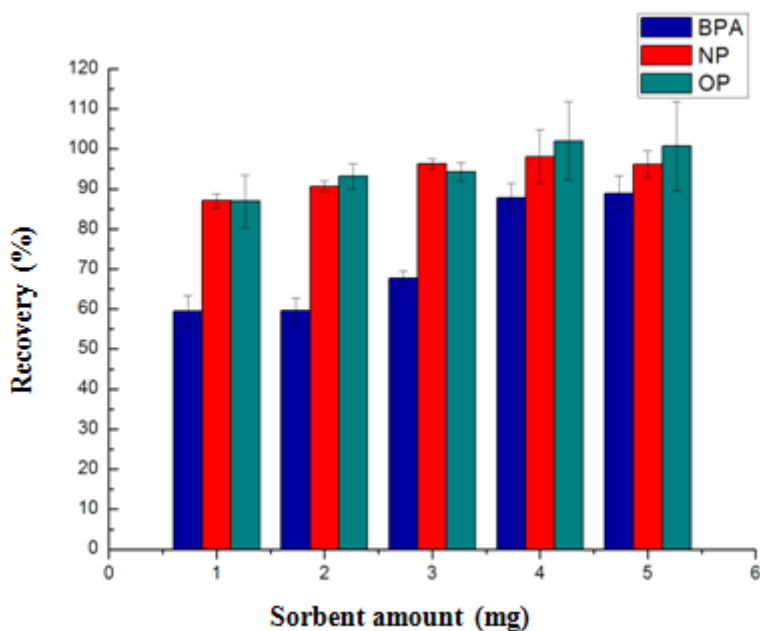

Figure S2 Effect of amount of HM-PAN nanofibers mat on the recoveries of three PEEs (n =6)

Figure S3

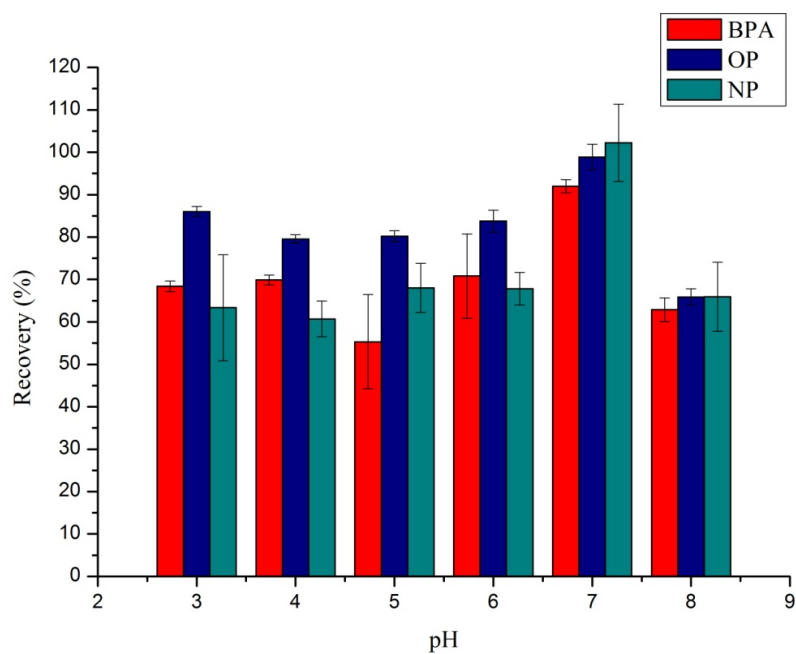

Figure S3 Effect of solution pH on the recoveries of three PEEs (n =6)

Figure S4

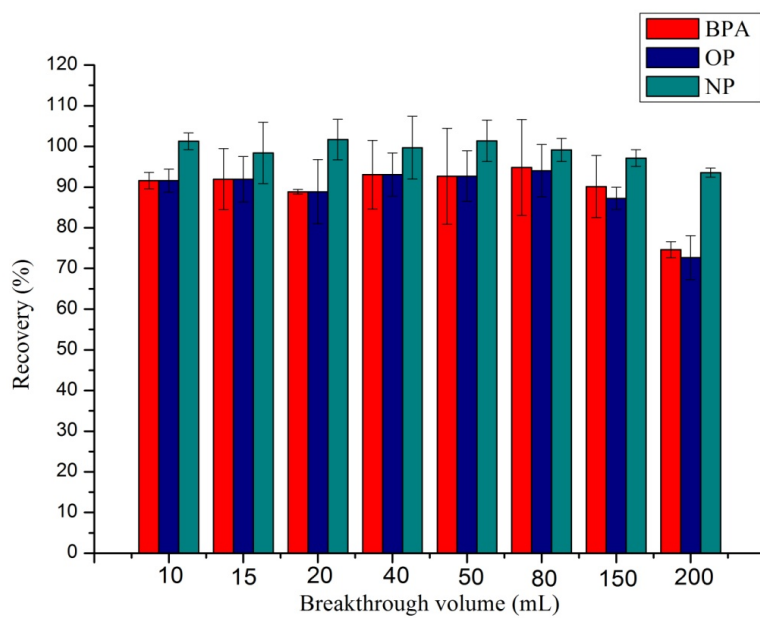

Figure S4 Effect of sample volume on the recoveries of three PEEs (n =6)

Figure S5

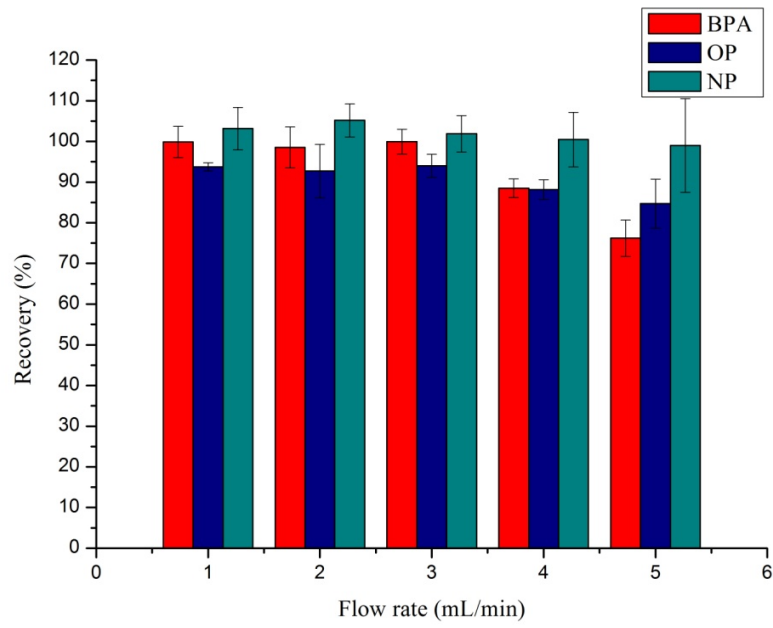

Figure S5 Effect of flow rate on the recoveries of three PEEs (n =6)
